# Supplementary material
Source: publisher figshare collection journal article supplement (https://gsapubs.figshare.com/ndownloader/files/22756274)

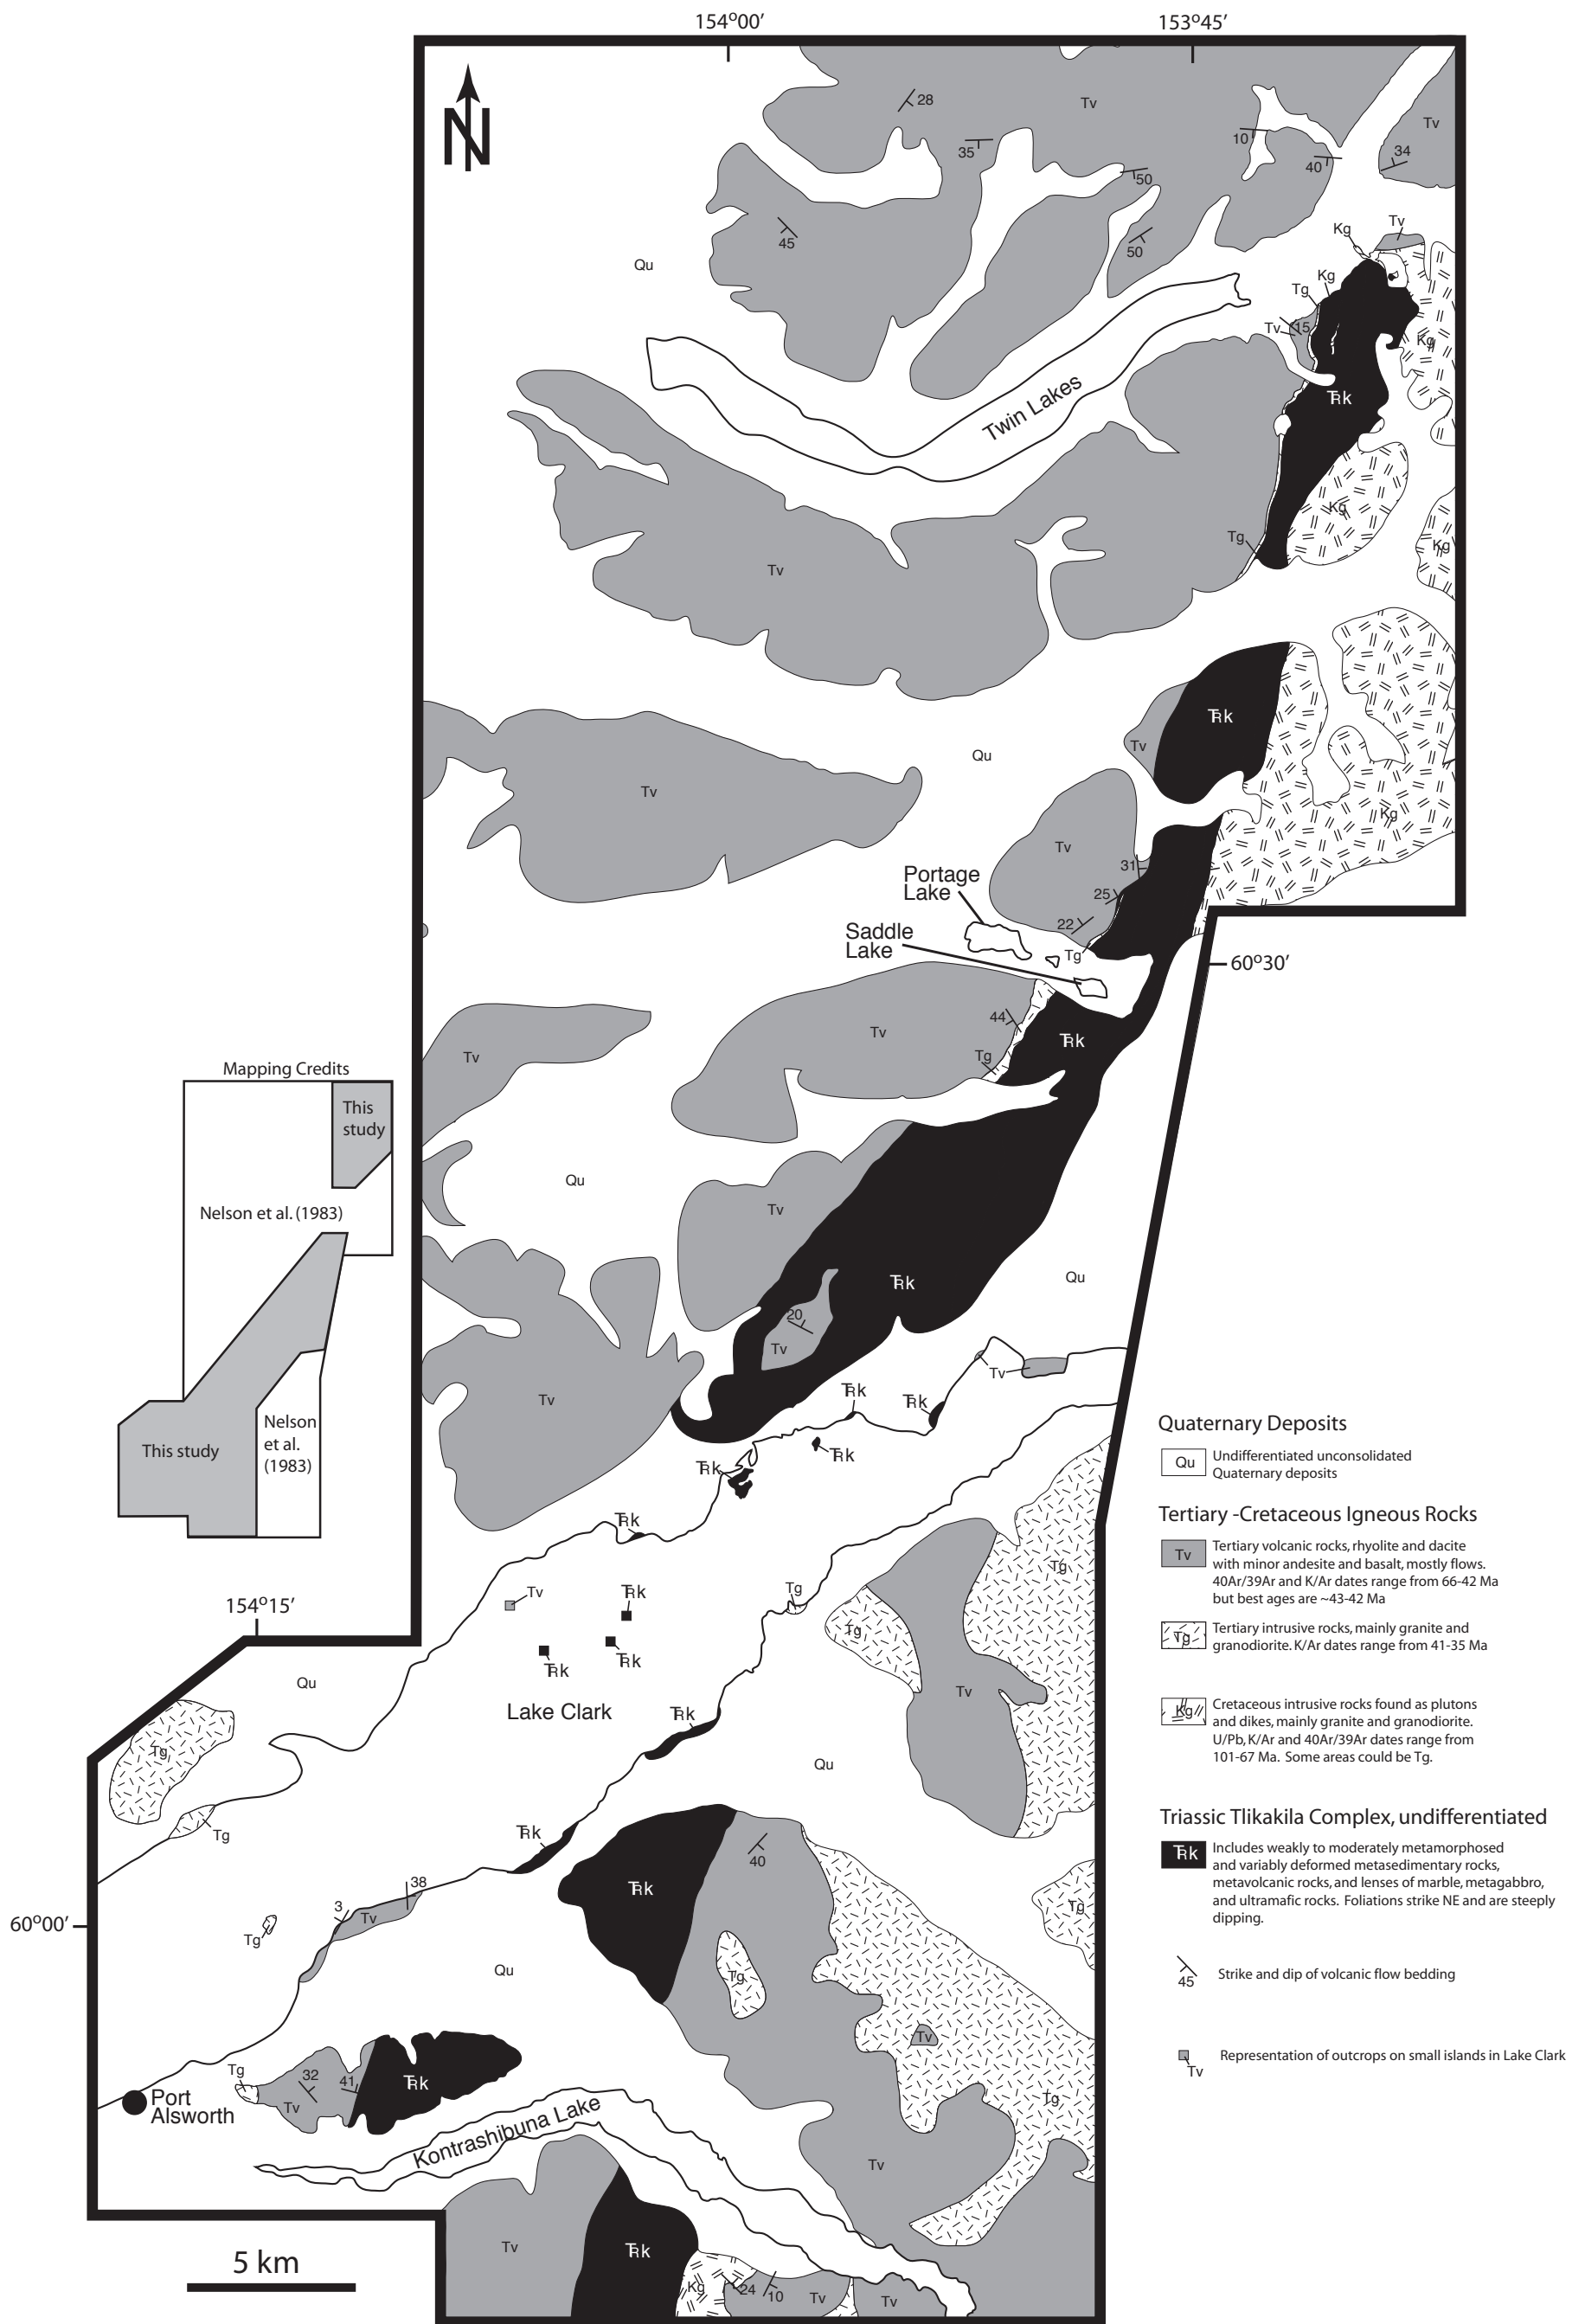

Bedrock Geologic Map of the Tlikakila Complex and Adjacent Rocks of the Lake Clark Region

Supplement: Supplementary file 1 [file 22756274]
